# Supplementary material for: Lysine Residues in the MK-Rich Region Are Not Required for Binding of the PbsP Protein From Group B Streptococci to Plasminogen
Source: PubMed Central journal article supplement (PMC8455988; doi:10.3389/fcimb.2021.679792), 2021-09-08
Supplement: DataSheet_1.pdf [file DataSheet_1.pdf]

## Table S1. Amino acid sequence of MK-rich domain

**M12K** (N<sub>423</sub> – N<sub>484</sub>):

NSTSM**MM****KK****DK**MTMP**MM****KK**EMTSS**K**INTGMMMSNN**K**MSANMQMSSQA**K**SND**K**AG**KK**MSMMS**K**N

**Mut1** (Lys430 Lys 431 Lys 433 Lys 439 and Lys 440 replaced with **alanine**):

NSTSM**MM****AA****DA**MTMP**MA****AA**EMTSSKINTGMMMSNNKMSANMQMSSQA**K**SNDKAGKKMSMMSK**N**

**Mut2** (Lys446 and Lys457 replaced with **alanine**):

NSTSM**MM****KK****DK**MTMP**MM****KK**EMTSS**A**INTGMMMSNN**A**MSANMQMSSQA**K**SNDKAGKKMSMMSK**N**

**Mut3** (Lys469 Lys 473 Lys 476 Lys 477 and Lys 483 replaced with **alanine**):

NSTSM**MM****KK****DK**MTMP**MM****KK**EMTSSKINTGMMMSNNKMSANMQMSSQA**A**SND**A**AG**AA**MSMMS**A****N**

**Mut4** (Lys430 Lys 431 Lys 433 Lys 439 Lys 440 Lys446 Lys457 Lys469 Lys 473 Lys 476 Lys 477 and Lys483 replaced with **alanine**):

NSTSM**MM****AA****DA**MTMP**MA****AA**EMTSS**A**INTGMMMSNN**A**MSANMQMSSQA**A**SND**A**AG**AA**MSMMS**A****N**

\* Lysine residues in the M12K fragment and mutated Lysine residues in the Mut 1-4 fragments are indicated in underlined bold.
