# Supplementary material for: Lysine Residues in the MK-Rich Region Are Not Required for Binding of the PbsP Protein From Group B Streptococci to Plasminogen
Source: PubMed Central journal article supplement (PMC8455988; doi:10.3389/fcimb.2021.679792), 2021-09-08
Supplement: DataSheet_2.pdf [file DataSheet_2.pdf]

**Table S2.** Plasmids and primers used in the study

| I.D.                     | Description <sup>a-b</sup>                                                                          |
|--------------------------|-----------------------------------------------------------------------------------------------------|
| <i>Plasmids</i>          |                                                                                                     |
| pDONR221                 | <i>E. coli</i> cloning vector, Km <sup>R</sup> , with attR sites for the Gateway cloning system     |
| pDEST15                  | <i>E. coli</i> expression vector, Amp <sup>R</sup> , with attR sites for the Gateway cloning system |
| pDEST15_M12K             | pDEST15 vector carrying a sequence encoding M12K (residues 423 - 484)                               |
| pDEST15_Mut1             | pDEST15_M12K vector encoding for Mut1                                                               |
| pDEST15_Mut2             | pDEST15_M12K vector encoding for Mut2                                                               |
| pDEST15_Mut3             | pDEST15_M12K vector encoding for Mut3                                                               |
| pDEST15_Mut4             | pDEST15_M12K vector encoding for Mut4                                                               |
| <i>Primers</i>           |                                                                                                     |
|                          | To amplify oligonucleotides encoding for M12K and Mut1                                              |
| M12K <sub>423</sub> _up  | <b>GGGGACAAGTTTGTACAAAAAAGCAGGCTTTAATAGCACATCAATGATGATG</b>                                         |
| M12K <sub>484</sub> _low | <b>GGGGACCACTTTGTACAAGAAAGCTGGGTTTTAATTTTGTAGACATCATAGACAT</b>                                      |
|                          | To amplify oligonucleotides encoding for Mut2, Mut3, Mut4                                           |
| M12K <sub>423</sub> _up  | <b>GGGGACAAGTTTGTACAAAAAAGCAGGCTTTAATAGCACATCAATGATGATG</b>                                         |
| Mut4 <sub>483</sub> _low | <b>GGGGACCACTTTGTACAAGAAAGCTGGGTTTTAATTTGCAGACATCATAGACAT</b>                                       |

**a.** Km<sup>R</sup>, kanamycin resistance; Amp<sup>R</sup>, ampicillin resistance.

**b.** Recombination sites are indicated by nucleotides in bold.
